# Supplementary material
Source: HighWire-hosted journal article supplement (http://www.jrheum.org/highwire/filestream/29806/field_highwire_adjunct_files/0/151353DataSuppl.pdf)
Supplement: 151353DataSuppl.pdf [file 151353DataSuppl.pdf]

## ONLINE SUPPLEMENTARY DATA

*Supplementary Figure 1.* The search strategy for systemic sclerosis studies that recorded a prevalence of scleroderma renal crisis (SRC).

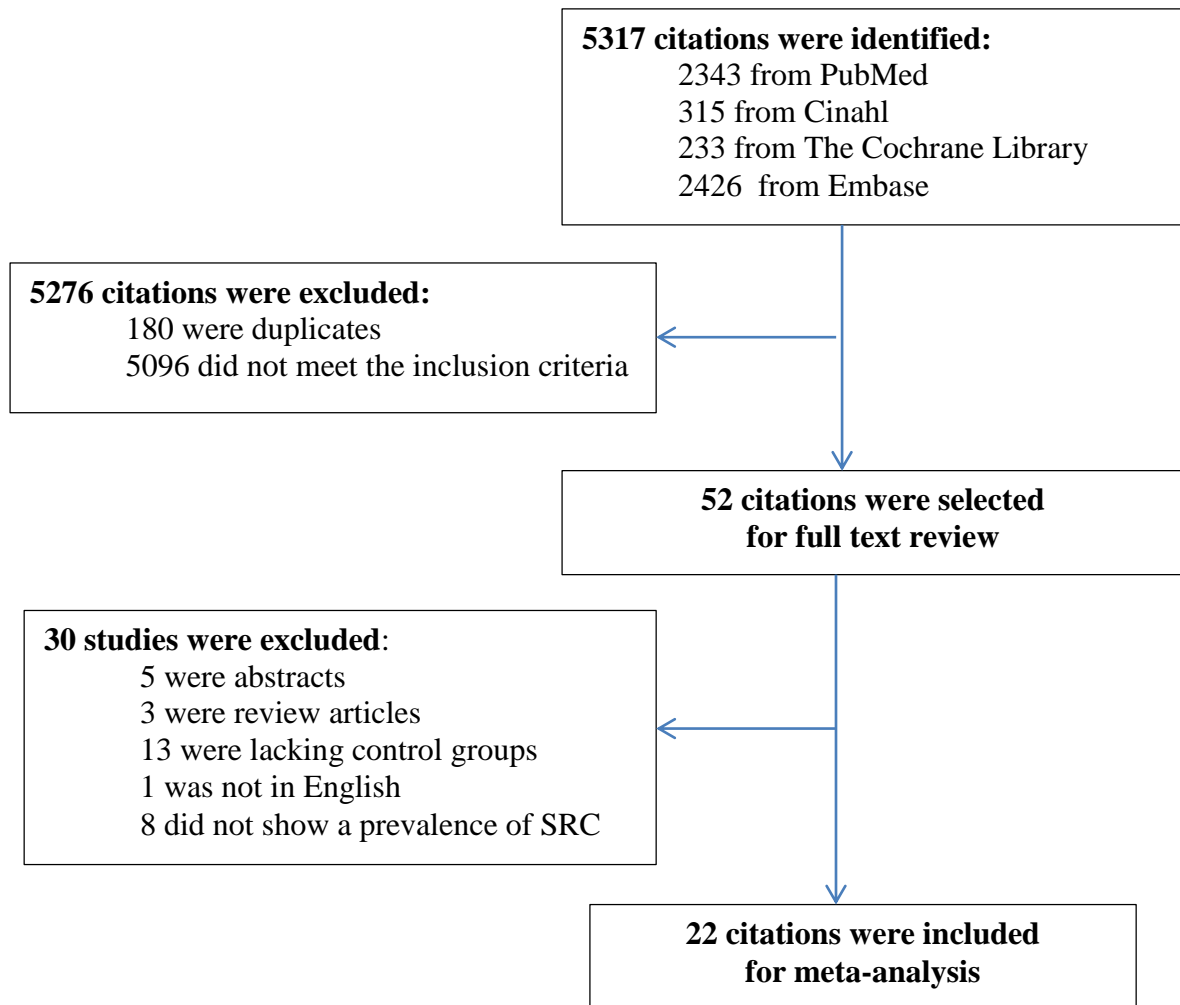

*Supplementary Figure 2.* Funnel plot for the frequency of scleroderma renal crisis according to sample size in the studies where the distribution of lcSSc and dcSSc has not been specified (overall SSc). The plot is graphed vertically according to sample size. There may be publication bias for the non-classified SSc rates with one study appearing to be an outlier.

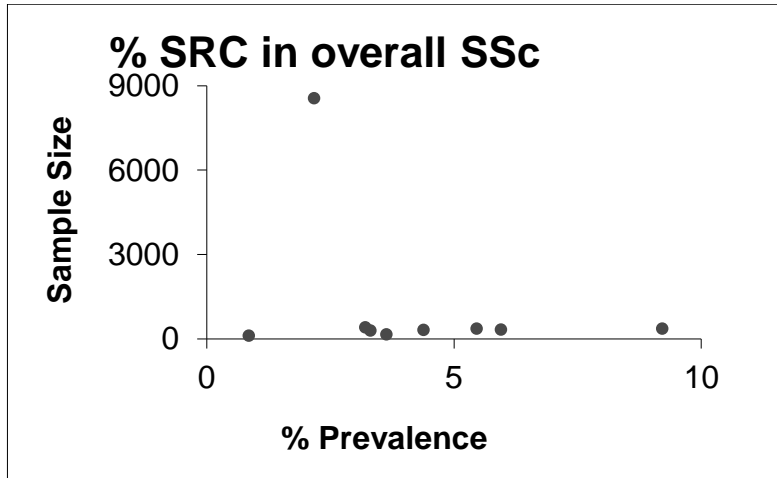

*Note:* SSc – systemic sclerosis; dcSSc - diffuse cutaneous systemic sclerosis subset; lcSSc – limited cutaneous systemic sclerosis subset; SRC – scleroderma renal crisis

*Supplementary Figure 3.* Funnel plot for the frequency of scleroderma renal crisis in diffuse cutaneous systemic sclerosis subset (dcSSc) in studies according to sample size.

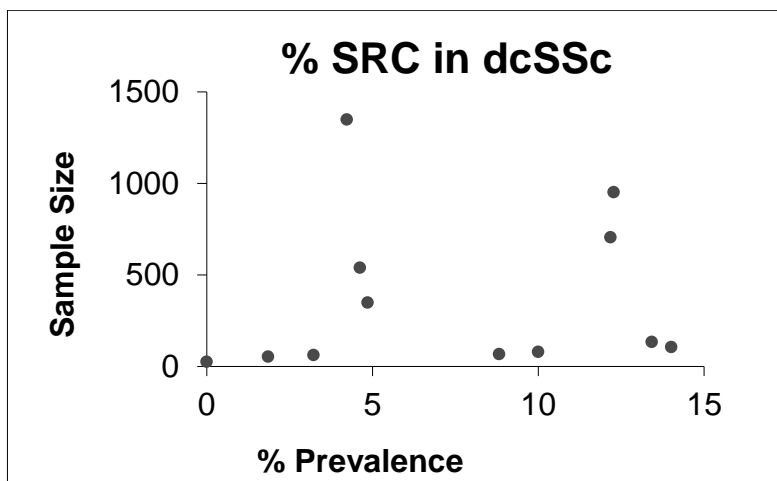

*Note:* SRC – scleroderma renal crisis
